# Supplementary material for: Availability, Prices and Affordability of Nationally Negotiated Antidiabetic Drugs in China: A National Survey
Source: Research Square preprint supplement (doi:10.21203/rs.3.rs-7700188/v1), 2025-11-07
Supplement: Supplementary file 1 [file c01ff474897f73c1764e3047.docx]

**Supplementary Table 2**  Monthle availability of national negotiated antidiabetic drugs in the investigated hospitals from 2018 to 2023.

| Year | Month | Acarbose | Exenatide | Ertuglifozin | Beinaglutide | Dapagliflozin | Insulin degludec and insulin aspart | Dulaglutide | Empagliflozin | Polyethylene glycol loxenatide | Canaglifozin | Liraglutide | Lixisenatide |
| --- | --- | --- | --- | --- | --- | --- | --- | --- | --- | --- | --- | --- | --- |
| 2018 | 1 | 92.04 | 8.96 | - | 1.12 | 6.59 | - | - | - | - | - | 34.08 | - |
|  | 2 | 80.10 | 8.46 | - | 0.75 | 5.97 | - | - | 0.12 | - | - | 28.11 | - |
|  | 3 | 85.20 | 7.59 | - | 0.75 | 7.96 | - | - | 0.12 | - | - | 31.72 | - |
|  | 4 | 88.81 | 8.46 | - | 0.12 | 8.83 | - | - | 0.25 | - | - | 34.70 | - |
|  | 5 | 88.68 | 10.70 | - | 1.00 | 11.19 | - | - | 0.37 | - | - | 35.45 | - |
|  | 6 | 90.92 | 8.83 | - | 1.24 | 9.95 | - | - | 0.37 | - | - | 37.56 | - |
|  | 7 | 89.18 | 7.46 | - | 1.12 | 11.57 | - | - | 1.24 | - | - | 35.57 | - |
|  | 8 | 89.43 | 6.34 | - | 1.00 | 11.82 | - | - | 1.12 | - | 0.37 | 39.30 | - |
|  | 9 | 92.41 | 8.08 | - | 0.75 | 13.06 | - | - | 1.24 | - | - | 43.16 | - |
|  | 10 | 86.57 | 6.97 | - | 0.75 | 11.32 | - | - | 1.87 | - | 1.24 | 34.33 | - |
|  | 11 | 91.79 | 7.96 | - | 1.00 | 15.30 | - | - | 2.11 | - | 2.11 | 41.04 | - |
|  | 12 | 91.67 | 8.08 | - | 1.24 | 14.55 | - | - | 1.99 | - | 2.24 | 42.54 | - |
| 2019 | 1 | 92.79 | 8.21 | - | 1.37 | 17.54 | - | - | 1.99 | - | 2.11 | 44.40 | - |
|  | 2 | 75.62 | 5.85 | - | 0.87 | 10.45 | - | - | 2.61 | - | 1.87 | 31.22 | - |
|  | 3 | 91.92 | 6.47 | - | 1.87 | 17.29 | - | - | 3.23 | - | 2.86 | 46.02 | - |
|  | 4 | 91.42 | 5.85 | - | 1.00 | 20.27 | - | - | 3.23 | - | 2.74 | 46.27 | 0.62 |
|  | 5 | 90.92 | 5.22 | - | 1.24 | 19.15 | - | 1.12 | 3.48 | - | 3.48 | 42.66 | 0.37 |
|  | 6 | 90.30 | 7.84 | - | 1.49 | 18.41 | - | 0.62 | 5.60 | - | 4.48 | 46.77 | 0.12 |
|  | 7 | 91.42 | 9.08 | - | 1.99 | 21.64 | - | 1.99 | 6.22 | 0.12 | 4.98 | 47.51 | 0.50 |
|  | 8 | 90.42 | 7.59 | - | 1.00 | 21.14 | - | 2.74 | 6.84 | 0.75 | 5.10 | 48.26 | 0.12 |
|  | 9 | 94.78 | 6.97 | - | 1.49 | 23.63 | - | 2.74 | 8.08 | 0.62 | 3.98 | 52.11 | 0.25 |
|  | 10 | 88.31 | 6.72 | - | 1.87 | 20.27 | - | 3.61 | 7.21 | 0.75 | 4.98 | 46.02 | 0.50 |
|  | 11 | 91.92 | 6.22 | - | 0.87 | 26.24 | 0.25 | 4.23 | 7.34 | 1.24 | 4.85 | 47.39 | 0.25 |
|  | 12 | 92.54 | 5.22 | - | 1.24 | 25.37 | 0.25 | 4.85 | 7.71 | 1.00 | 5.22 | 52.24 | 0.37 |
| 2020 | 1 | 90.42 | 9.95 | - | 1.62 | 46.14 | 0.62 | 5.35 | 14.80 | 1.24 | 8.46 | 57.59 | 2.36 |
|  | 2 | 70.15 | 4.85 | - | 0.62 | 31.84 | 0.12 | 2.99 | 10.07 | 0.50 | 5.60 | 38.81 | 1.37 |
|  | 3 | 75.87 | 5.60 | - | 0.75 | 44.15 | 0.62 | 4.35 | 13.81 | 1.37 | 7.21 | 46.14 | 3.61 |
|  | 4 | 83.96 | 9.20 | - | 1.12 | 54.10 | 1.49 | 6.09 | 19.15 | 2.24 | 12.56 | 55.10 | 5.60 |
|  | 5 | 78.98 | 7.96 | - | 1.24 | 55.97 | 1.62 | 6.47 | 21.89 | 3.11 | 15.05 | 53.98 | 6.84 |
|  | 6 | 77.74 | 10.70 | - | 1.24 | 60.57 | 2.99 | 7.46 | 25.75 | 3.36 | 19.03 | 57.84 | 10.45 |
|  | 7 | 73.51 | 9.95 | - | 1.24 | 62.56 | 2.74 | 9.20 | 29.85 | 3.61 | 19.78 | 55.97 | 10.70 |
|  | 8 | 69.40 | 11.57 | - | 1.62 | 64.43 | 4.60 | 9.95 | 31.34 | 3.98 | 21.27 | 56.59 | 12.81 |
|  | 9 | 72.01 | 12.81 | - | 1.12 | 69.78 | 5.22 | 11.82 | 35.57 | 4.98 | 24.38 | 61.44 | 15.67 |
|  | 10 | 69.03 | 10.82 | - | 0.62 | 61.82 | 4.85 | 8.83 | 33.08 | 4.60 | 21.52 | 54.23 | 12.56 |
|  | 11 | 71.89 | 11.82 | - | 1.37 | 67.41 | 7.34 | 10.32 | 33.46 | 5.35 | 25.75 | 58.46 | 14.93 |
|  | 12 | 72.01 | 12.56 | - | 0.75 | 66.79 | 7.34 | 12.56 | 35.57 | 5.47 | 26.87 | 60.45 | 17.29 |
| 2021 | 1 | 72.39 | 14.05 | - | 1.37 | 73.88 | 9.20 | 13.31 | 38.93 | 6.09 | 27.11 | 65.42 | 16.04 |
|  | 2 | 65.30 | 10.07 | 0.12 | 1.12 | 60.20 | 7.21 | 13.06 | 31.34 | 5.10 | 24.63 | 51.00 | 12.31 |
|  | 3 | 67.16 | 10.82 | 2.49 | 1.99 | 69.03 | 24.38 | 26.12 | 36.44 | 10.45 | 26.12 | 60.20 | 13.31 |
|  | 4 | 70.77 | 11.82 | 3.48 | 1.49 | 74.38 | 30.35 | 32.34 | 31.47 | 12.56 | 27.74 | 62.31 | 13.68 |
|  | 5 | 69.15 | 10.57 | 3.73 | 2.24 | 72.01 | 36.32 | 34.20 | 38.43 | 14.18 | 29.85 | 58.83 | 12.44 |
|  | 6 | 68.66 | 10.57 | 4.48 | 3.36 | 71.52 | 42.79 | 39.30 | 38.31 | 16.17 | 30.10 | 63.56 | 12.81 |
|  | 7 | 72.64 | 9.58 | 7.21 | 4.35 | 76.00 | 44.28 | 41.79 | 40.05 | 16.67 | 29.73 | 61.07 | 13.68 |
|  | 8 | 72.39 | 9.83 | 7.09 | 4.23 | 76.74 | 46.89 | 43.66 | 40.92 | 17.04 | 30.47 | 62.19 | 14.30 |
|  | 9 | 72.76 | 9.83 | 8.46 | 3.23 | 77.99 | 49.88 | 48.51 | 42.66 | 18.41 | 32.59 | 64.05 | 13.31 |
|  | 10 | 70.90 | 7.96 | 8.58 | 2.61 | 71.39 | 47.76 | 44.28 | 37.94 | 15.92 | 26.99 | 54.35 | 9.95 |
|  | 11 | 71.14 | 9.83 | 12.94 | 3.73 | 77.86 | 56.34 | 49.00 | 43.41 | 18.53 | 31.84 | 60.45 | 8.33 |
|  | 12 | 74.13 | 8.71 | 13.31 | 2.74 | 73.13 | 54.85 | 55.47 | 41.17 | 18.53 | 32.96 | 62.69 | 7.34 |
| 2022 | 1 | 74.63 | 9.20 | 14.18 | 2.74 | 83.08 | 65.42 | 57.46 | 43.41 | 20.77 | 33.71 | 71.27 | 6.09 |
|  | 2 | 62.56 | 5.47 | 11.69 | 1.62 | 58.08 | 59.83 | 47.51 | 33.21 | 13.18 | 24.63 | 42.29 | 3.36 |
|  | 3 | 70.40 | 7.21 | 17.16 | 2.49 | 78.23 | 65.30 | 59.45 | 42.04 | 17.79 | 31.22 | 57.21 | 3.48 |
|  | 4 | 70.15 | 7.71 | 18.28 | 2.36 | 77.24 | 61.32 | 55.47 | 40.92 | 18.53 | 30.72 | 54.98 | 1.87 |
|  | 5 | 70.65 | 5.72 | 17.66 | 1.49 | 76.24 | 58.58 | 58.58 | 41.67 | 18.28 | 31.22 | 50.25 | 2.11 |
|  | 6 | 70.77 | 5.47 | 19.28 | 1.74 | 75.50 | 65.80 | 61.32 | 43.41 | 21.39 | 31.59 | 56.22 | 1.62 |
|  | 7 | 73.76 | 7.09 | 18.91 | 1.99 | 80.60 | 66.17 | 59.95 | 44.28 | 19.78 | 33.46 | 56.84 | 1.74 |
|  | 8 | 75.25 | 5.85 | 18.66 | 1.62 | 80.60 | 68.78 | 63.68 | 44.90 | 21.02 | 34.33 | 57.96 | 2.11 |
|  | 9 | 75.00 | 5.35 | 18.78 | 1.37 | 78.48 | 68.41 | 62.19 | 45.77 | 22.76 | 33.46 | 60.95 | 1.49 |
|  | 10 | 71.52 | 4.35 | 16.29 | 1.37 | 74.88 | 65.17 | 58.08 | 42.66 | 21.64 | 28.73 | 53.73 | 1.62 |
|  | 11 | 71.52 | 4.60 | 18.78 | 1.99 | 76.00 | 67.54 | 58.08 | 43.03 | 23.13 | 30.47 | 55.35 | 0.87 |
|  | 12 | 71.64 | 3.98 | 19.15 | 1.37 | 69.78 | 68.03 | 59.58 | 43.28 | 23.63 | 33.08 | 56.59 | 0.75 |
| 2023 | 1 | 72.89 | 4.85 | 18.78 | 0.62 | 82.71 | 72.01 | 62.94 | 45.77 | 22.76 | 32.34 | 60.57 | 0.75 |
|  | 2 | 63.31 | 4.98 | 18.78 | 1.62 | 68.53 | 63.56 | 59.45 | 42.54 | 22.39 | 29.23 | 48.63 | 0.37 |
|  | 3 | 71.77 | 4.98 | 22.39 | 1.99 | 80.97 | 75.00 | 64.05 | 45.15 | 25.50 | 32.09 | 60.45 | 0.62 |
|  | 4 | 74.88 | 3.73 | 20.40 | 1.99 | 82.46 | 73.51 | 61.44 | 46.64 | 25.37 | 33.08 | 60.07 | 0.37 |
|  | 5 | 73.63 | 4.10 | 22.01 | 2.36 | 82.09 | 70.52 | 60.57 | 46.52 | 25.25 | 32.34 | 58.21 | 0.37 |
|  | 6 | 73.63 | 3.86 | 22.64 | 2.86 | 79.10 | 72.64 | 61.44 | 46.14 | 26.99 | 29.35 | 59.33 | 0.50 |
|  | 7 | 72.26 | 3.48 | 22.76 | 1.12 | 82.21 | 69.40 | 58.58 | 45.02 | 22.51 | 30.97 | 56.22 | 0.50 |
|  | 8 | 72.26 | 3.86 | 21.52 | 1.00 | 80.60 | 69.28 | 58.58 | 45.52 | 22.14 | 30.10 | 50.37 | 0.37 |
|  | 9 | 74.75 | 3.48 | 24.00 | 0.50 | 80.85 | 72.26 | 58.08 | 46.77 | 22.01 | 31.34 | 53.61 | 0.12 |
|  | 10 | 71.39 | 2.86 | 21.14 | 0.25 | 76.99 | 66.92 | 54.10 | 44.15 | 20.27 | 28.98 | 50.25 | 0.12 |
|  | 11 | 70.90 | 2.49 | 22.39 | 0.25 | 78.36 | 67.29 | 55.60 | 44.78 | 22.76 | 29.60 | 54.73 | 0.12 |
|  | 12 | 66.67 | 1.74 | 23.38 | - | 69.90 | 66.92 | 54.48 | 43.66 | 20.65 | 28.73 | 53.61 | - |

Note: “ - ”means “ no relevant data was collected ” ; The unit of availability is “ % ”.
