# Supplementary material for: Availability, Prices and Affordability of Nationally Negotiated Antidiabetic Drugs in China: A National Survey
Source: Research Square preprint supplement (doi:10.21203/rs.3.rs-7700188/v1), 2025-11-07
Supplement: Supplementary file 2 [file cef320d854d405cb63f9b53d.docx]

**Supplementary Table 1**  Availability of national negotiated antidiabetic drugs in the investigated hospitals

| No | Name | All Hospitals (%) | | | | | | Tertiary General Hospital (%) | | | | | | Secondary General Hospital (%) | | | | | |
| --- | --- | --- | --- | --- | --- | --- | --- | --- | --- | --- | --- | --- | --- | --- | --- | --- | --- | --- | --- |
| 2018 | 2019 | 2020 | 2021 | 2022 | 2023 | 2018 | 2019 | 2020 | 2021 | 2022 | 2023 | 2018 | 2019 | 2020 | 2021 | 2022 | 2023 |
| 1 | Insulin degludec and insulin aspart | - | 0.33 | 3.08 | 35.44 | **62.24** | **67.60** | - | 0.09 | 3.72 | 41.64 | **70.55** | **74.57** | - | 0.56 | 2.43 | 29.24 | **53.93** | **60.64** |
| 2 | Acarbose | **87.68** | **89.08** | **74.69** | **69.9** | **70.46** | **70.34** | **91.31** | **92.4** | **76.85** | **72.04** | **73.53** | **73.88** | **84.05** | **85.77** | **72.53** | **67.76** | **67.38** | **66.79** |
| 3 | Exenatide | 6.45 | 5.4 | 7.96 | 8.36 | 4.93 | 3.11 | 11.53 | 9.47 | 13.49 | 14.14 | 8.12 | 4.87 | 1.37 | 1.34 | 2.43 | 2.59 | 1.75 | 1.34 |
| 4 | Liraglutide | 33.16 | 41.86 | **50.71** | **56.65** | **52.75** | **51.67** | 43 | **53.91** | **62.65** | **68.14** | **62.83** | **63.08** | 23.31 | 29.81 | 38.76 | 45.16 | 42.67 | 40.26 |
| 5 | Lixisenatide | - | 0.28 | 8.18 | 10.48 | 1.9 | 0.3 | - | 0.48 | 12.15 | 15.88 | 2.96 | 0.56 | - | 0.08 | 4.21 | 5.09 | 0.84 | 0.03 |
| 6 | Beinaglutide | 0.78 | 1.1 | 0.93 | 2.23 | 1.43 | 1.01 | 1.13 | 1.86 | 1.46 | 3.65 | 2.67 | 1.95 | 0.44 | 0.34 | 0.41 | 0.81 | 0.19 | 0.07 |
| 7 | Dulaglutide | - | 2.45 | 7.03 | 34.34 | **55.08** | **55.38** | - | 3.31 | 9.76 | 41.53 | **65.11** | **66.50** | - | 1.59 | 4.31 | 27.15 | 45.04 | 44.26 |
| 8 | Polyethylene glycol loxenatide | - | 0.67 | 2.83 | 12.11 | 16.98 | 19.35 | - | 0.9 | 4.28 | 18.14 | 26.44 | 30.87 | - | 0.44 | 1.37 | 6.09 | 7.52 | 7.83 |
| 9 | Dapagliflozin | 9.69 | 18.72 | **55.37** | **71.28** | **73.68** | **77.11** | 12.62 | 22.87 | **60.61** | **75.95** | **79.78** | **81.94** | 6.77 | 14.58 | **50.12** | **66.6** | **67.57** | **72.28** |
| 10 | Canaglifozin | 1.52 | 3.58 | 15.16 | 26.66 | 28.85 | 28.16 | 1.44 | 4.5 | 21.49 | 34.16 | 36.39 | 35.66 | 1.59 | 2.65 | 8.83 | 19.16 | 21.32 | 20.66 |
| 11 | Empagliflozin | 1.01 | 5.2 | 23.63 | 36.12 | 40.59 | 43.57 | 0.93 | 5.48 | 28.79 | 42.97 | 45.93 | 48.48 | 1.09 | 4.93 | 18.48 | 29.28 | 35.24 | 38.67 |
| 12 | Ertuglifozin | - | - | - | 6.24 | 16.28 | 20.27 | - | - | - | 7.13 | 19.62 | 24.49 | - | - | - | 5.35 | 12.95 | 16.04 |

Note: The availability >50% were bolded; “ - ” means “ no relevant data was collected ”
