# Supplementary material for: Availability, Prices and Affordability of Nationally Negotiated Antidiabetic Drugs in China: A National Survey
Source: Research Square preprint supplement (doi:10.21203/rs.3.rs-7700188/v1), 2025-11-07
Supplement: Supplementary file 3 [file ebf4034b00658a6b633d25da.docx]

**Supplementary Table 3**  Monthle availability of national negotiated hypoglycemic drugs in secondary general hospitals from 2018 to 2023.

| year | month | Acarbose | Exenatide | Ertuglifozin | Beinaglutide | Dapagliflozin | Insulin degludec and insulin aspart | Dulaglutide | Empagliflozin | Polyethylene glycol loxenatide | Canaglifozin | Liraglutide | Lixisenatide |
| --- | --- | --- | --- | --- | --- | --- | --- | --- | --- | --- | --- | --- | --- |
| 2018 | 1 | 85.77 | 1.87 | - | 0.37 | 6.37 | - | - | - | - | - | 20.22 | - |
|  | 2 | 70.79 | 1.50 | - | 0.37 | 3.00 | - | - | 0.37 | - | - | 17.23 | - |
|  | 3 | 78.28 | 0.75 | - | 0.75 | 4.49 | - | - | 0.37 | - | - | 17.60 | - |
|  | 4 | 85.77 | 1.12 | - | - | 4.49 | - | - | 0.75 | - | - | 22.10 | - |
|  | 5 | 81.65 | 0.75 | - | 0.75 | 5.62 | - | - | 0.75 | - | - | 22.85 | - |
|  | 6 | 86.14 | 1.87 | - | 1.12 | 6.37 | - | - | 0.37 | - | - | 21.35 | - |
|  | 7 | 86.52 | 1.12 | - | 1.50 | 7.87 | - | - | 0.75 | - | - | 23.60 | - |
|  | 8 | 85.77 | 1.87 | - | 0.37 | 7.12 | - | - | 1.12 | - | 1.12 | 23.97 | - |
|  | 9 | 87.64 | 1.50 | - | - | 9.36 | - | - | 1.87 | - | - | 28.84 | - |
|  | 10 | 82.77 | 1.50 | - | - | 7.49 | - | - | 2.25 | - | 1.12 | 23.97 | - |
|  | 11 | 89.14 | 1.50 | - | - | 8.24 | - | - | 2.25 | - | 2.25 | 29.21 | - |
|  | 12 | 88.39 | 1.12 | - | - | 10.86 | - | - | 1.12 | - | 1.87 | 28.84 | - |
| 2019 | 1 | 89.51 | 1.50 | - | 0.75 | 13.48 | - | - | 1.87 | - | 2.25 | 27.34 | - |
|  | 2 | 68.54 | 1.12 | - | - | 5.24 | - | - | 2.25 | - | 1.12 | 15.73 | - |
|  | 3 | 87.27 | 1.50 | - | 0.37 | 12.73 | - | - | 3.00 | - | 2.25 | 30.71 | - |
|  | 4 | 86.89 | 1.50 | - | 0.75 | 12.73 | - | - | 3.37 | - | 2.62 | 31.09 | - |
|  | 5 | 87.64 | 1.50 | - | 0.75 | 15.36 | - | 0.75 | 3.75 | - | 2.25 | 25.09 | - |
|  | 6 | 86.14 | 0.75 | - | - | 13.11 | - | 0.37 | 4.87 | - | 3.00 | 31.46 | - |
|  | 7 | 88.76 | 1.50 | - | - | 15.36 | - | 0.75 | 5.99 | - | 2.62 | 29.21 | 0.37 |
|  | 8 | 83.15 | 1.12 | - | - | 14.61 | - | 1.12 | 6.37 | 0.75 | 4.12 | 32.96 | - |
|  | 9 | 91.76 | 1.50 | - | - | 17.23 | - | 1.50 | 7.49 | 0.37 | 2.62 | 33.33 | - |
|  | 10 | 83.52 | 1.50 | - | 0.75 | 12.73 | - | 3.00 | 5.99 | 1.12 | 4.12 | 31.84 | 0.37 |
|  | 11 | 86.14 | 1.87 | - | 0.37 | 20.97 | 0.75 | 2.25 | 7.12 | 0.37 | 2.25 | 31.09 | - |
|  | 12 | 89.89 | 0.75 | - | 0.37 | 21.35 | 0.37 | 3.00 | 7.12 | - | 2.62 | 37.83 | - |
| 2020 | 1 | 85.39 | 1.12 | - | 0.37 | 38.20 | 1.12 | 2.62 | 13.11 | 0.75 | 3.75 | 38.58 | 0.75 |
|  | 2 | 67.04 | 2.25 | - | 0.37 | 26.22 | - | 1.87 | 10.11 | 0.37 | 2.62 | 31.09 | 1.12 |
|  | 3 | 72.66 | 1.50 | - | - | 35.58 | 0.75 | 3.00 | 10.49 | 1.12 | 3.00 | 32.96 | 1.50 |
|  | 4 | 79.40 | 2.25 | - | 0.37 | 47.19 | 1.87 | 3.37 | 14.23 | 1.12 | 4.49 | 40.07 | 1.87 |
|  | 5 | 78.28 | 2.25 | - | 0.75 | 47.57 | 1.50 | 2.62 | 15.73 | 2.25 | 6.74 | 41.20 | 4.49 |
|  | 6 | 76.78 | 3.37 | - | 1.12 | 56.18 | 2.62 | 3.37 | 18.35 | 1.12 | 8.61 | 40.82 | 4.12 |
|  | 7 | 73.03 | 2.25 | - | 0.75 | 56.18 | 2.62 | 3.75 | 21.72 | 2.25 | 8.99 | 39.70 | 4.12 |
|  | 8 | 65.17 | 3.00 | - | 0.37 | 55.81 | 1.87 | 4.87 | 21.35 | 1.50 | 11.24 | 40.07 | 7.12 |
|  | 9 | 70.41 | 2.62 | - | 0.37 | 62.92 | 5.24 | 8.24 | 25.47 | 2.25 | 14.23 | 42.70 | 6.74 |
|  | 10 | 64.04 | 3.00 | - | - | 55.06 | 3.00 | 4.49 | 24.34 | 0.75 | 13.48 | 38.58 | 4.87 |
|  | 11 | 68.54 | 3.00 | - | - | 59.93 | 4.12 | 5.24 | 22.47 | 1.50 | 14.98 | 39.70 | 5.99 |
|  | 12 | 69.66 | 2.62 | - | 0.37 | 60.67 | 4.49 | 8.24 | 24.34 | 1.50 | 13.86 | 39.70 | 7.87 |
| 2021 | 1 | 71.91 | 4.12 | - | 0.37 | 67.79 | 6.74 | 8.99 | 26.97 | 3.00 | 15.36 | 50.56 | 6.74 |
|  | 2 | 61.42 | 2.25 | - | 0.37 | 52.81 | 4.12 | 6.74 | 21.72 | 1.87 | 15.36 | 34.46 | 5.99 |
|  | 3 | 66.29 | 3.37 | 2.25 | 0.37 | 63.67 | 17.23 | 17.60 | 27.72 | 4.49 | 14.98 | 43.07 | 4.49 |
|  | 4 | 68.91 | 3.00 | 3.00 | 0.75 | 67.04 | 23.97 | 21.35 | 22.47 | 5.99 | 15.73 | 46.44 | 6.37 |
|  | 5 | 67.42 | 3.00 | 3.00 | 1.12 | 64.79 | 30.34 | 23.60 | 28.84 | 7.12 | 20.22 | 43.82 | 4.12 |
|  | 6 | 60.67 | 3.00 | 4.12 | 1.12 | 65.92 | 32.58 | 28.09 | 26.97 | 7.87 | 21.35 | 48.69 | 4.49 |
|  | 7 | 69.66 | 3.00 | 7.12 | 1.87 | 68.91 | 35.96 | 31.84 | 29.96 | 5.99 | 19.85 | 43.82 | 5.62 |
|  | 8 | 70.04 | 1.50 | 4.87 | 1.12 | 70.04 | 37.08 | 32.96 | 31.46 | 6.74 | 20.22 | 45.69 | 7.12 |
|  | 9 | 68.91 | 3.00 | 8.61 | 0.75 | 72.28 | 38.20 | 38.58 | 33.33 | 6.74 | 23.22 | 48.69 | 5.99 |
|  | 10 | 67.79 | 1.50 | 6.37 | 0.75 | 66.29 | 38.58 | 33.33 | 31.09 | 6.74 | 19.10 | 43.45 | 4.12 |
|  | 11 | 69.29 | 1.87 | 9.36 | 0.75 | 73.41 | 44.57 | 37.83 | 36.33 | 6.74 | 23.22 | 45.32 | 3.37 |
|  | 12 | 70.79 | 1.50 | 10.11 | 0.37 | 66.29 | 41.57 | 44.94 | 34.46 | 9.74 | 21.35 | 47.94 | 2.62 |
| 2022 | 1 | 70.41 | 2.62 | 10.11 | - | 78.28 | 55.81 | 46.07 | 36.70 | 7.49 | 22.85 | 58.43 | 3.37 |
|  | 2 | 59.93 | 1.87 | 8.24 | - | 48.31 | 47.57 | 35.96 | 25.09 | 4.87 | 17.98 | 33.33 | 1.50 |
|  | 3 | 68.16 | 2.25 | 14.23 | - | 71.16 | 52.06 | 46.07 | 34.46 | 6.74 | 22.47 | 44.57 | 1.50 |
|  | 4 | 66.29 | 2.62 | 13.86 | 0.37 | 68.54 | 51.31 | 43.82 | 34.46 | 6.37 | 22.47 | 40.45 | 0.37 |
|  | 5 | 67.42 | 1.50 | 14.23 | 0.37 | 66.67 | 48.31 | 47.57 | 33.33 | 6.74 | 17.60 | 37.45 | 1.12 |
|  | 6 | 67.04 | 1.50 | 13.86 | 0.37 | 65.92 | 54.68 | 50.19 | 38.20 | 7.49 | 21.35 | 39.70 | 0.37 |
|  | 7 | 69.66 | 1.87 | 16.10 | - | 73.41 | 56.18 | 46.07 | 35.21 | 8.61 | 22.47 | 41.95 | 0.75 |
|  | 8 | 71.16 | 1.87 | 13.86 | - | 70.04 | 53.93 | 51.69 | 37.45 | 8.24 | 23.22 | 44.19 | 0.37 |
|  | 9 | 69.66 | 1.50 | 13.48 | 0.37 | 70.41 | 58.80 | 47.94 | 38.58 | 8.61 | 21.35 | 48.31 | 0.37 |
|  | 10 | 65.17 | 0.75 | 11.61 | - | 67.79 | 54.31 | 41.95 | 37.08 | 7.87 | 19.85 | 39.70 | 0.37 |
|  | 11 | 67.42 | 1.50 | 11.99 | 0.37 | 68.16 | 57.30 | 42.70 | 35.96 | 8.61 | 22.10 | 41.57 | - |
|  | 12 | 66.29 | 1.12 | 13.86 | 0.37 | 62.17 | 56.93 | 40.45 | 36.33 | 8.61 | 22.10 | 42.32 | - |
| 2023 | 1 | 70.41 | 1.12 | 13.48 | - | 76.40 | 62.55 | 49.81 | 39.33 | 6.37 | 20.60 | 44.94 | - |
|  | 2 | 55.43 | 1.50 | 13.11 | 0.37 | 58.05 | 52.81 | 44.57 | 35.21 | 7.49 | 18.35 | 34.08 | - |
|  | 3 | 66.29 | 1.50 | 16.85 | 0.37 | 73.78 | 65.92 | 49.06 | 38.20 | 8.99 | 21.35 | 43.07 | - |
|  | 4 | 71.16 | 1.87 | 14.61 | - | 74.91 | 63.67 | 46.07 | 38.95 | 8.24 | 23.22 | 41.95 | - |
|  | 5 | 69.29 | 1.87 | 16.48 | - | 76.40 | 63.67 | 49.06 | 41.57 | 7.49 | 20.97 | 44.19 | - |
|  | 6 | 65.92 | 1.50 | 15.73 | - | 71.91 | 63.30 | 45.69 | 37.83 | 10.11 | 18.73 | 41.95 | - |
|  | 7 | 67.42 | 1.12 | 16.48 | - | 75.28 | 59.18 | 43.07 | 39.70 | 7.87 | 20.60 | 43.45 | 0.37 |
|  | 8 | 67.79 | 1.87 | 15.36 | - | 74.16 | 60.30 | 43.82 | 38.20 | 7.12 | 21.72 | 35.21 | - |
|  | 9 | 71.91 | 0.75 | 19.10 | - | 75.66 | 65.54 | 44.57 | 40.07 | 7.12 | 23.60 | 40.45 | - |
|  | 10 | 67.04 | 2.25 | 16.48 | - | 71.54 | 55.43 | 37.83 | 37.83 | 8.24 | 19.85 | 37.83 | - |
|  | 11 | 65.92 | 0.37 | 16.10 | - | 74.16 | 57.68 | 40.07 | 38.20 | 8.24 | 19.85 | 37.45 | - |
|  | 12 | 62.92 | 0.37 | 18.73 | - | 65.17 | 57.68 | 37.45 | 38.95 | 6.74 | 19.10 | 38.58 | - |

Note: “-” means “no relevant data was collected ”; The unit of availability is “ % ”.
